# Supplementary material for: Dinosaur Speed Demon: The Caudal Musculature of Carnotaurus sastrei and Implications for the Evolution of South American Abelisaurids
Source: PLoS One. 2011 Oct 17;6(10):e25763. doi: 10.1371/journal.pone.0025763 (PMC3197156; doi:10.1371/journal.pone.0025763)
Supplement: Table S1 — Measurements of LACM 127704 (a cast of Carnotaurus sastrei MACN-CH 894). Direct measurements of MACN-CH 894 from Bonaparte et al. [1] included for comparison. All measurements given in millimeters. (XLSX) [file pone.0025763.s003.xlsx]

## Sheet: Sheet1
	Carnotaurus sastrei
	Natural History Museum of Los Angeles County
	LACM 127704 (cast of MACN-CH 894)
	Caudal Vertebra Number	1	2	3	4	5	6
	Spinous Process
	Maximum Height (from neural arch)	110	109	104	112	113	105
	Dorsal Run (from neural arch)	142	135	125	135	138	123
	Basal Length	74	73	77	81	75	70
	Basal Width	21	21	15	12	19	10
	Middle Length	61	60	47	48	43	43
	Tip Length	51	45	43	48	38	33
	Tip Width	26	23	29	24	28	14
	Caudal Rib/Transverse Process
	Maximum Height Centrum	215	180	210	230	205	200
	Maximum Lateral Width (from Neural Arch)	129	136	90	111	127	118
	Lateral Run (from centrum to tip)	225	215	240	245	220	215
	Basal Length	59	83	75	82	74	80
	Basal Thickness	46	40	24	23	38	28
	Middle Length	56	54	51	54	34	32
	Tip Thickness	10	12	12	10	10	15
	Tip Length	101	106	112	120	118	112
	Centrum
	Maximum Length	127	114	116	???	92	96
	Maximum Length (Bonaparte et al., 1990)	128	122	120	136	???	???
	Width Anterior	140	143	121	???	91	98
	Width Anterior (Bonaparte et al., 1990)	140	144	???	104	???	???
	Height Anterior	120	115	118	???	103	100
	Height Anterior (Bonaparte et al., 1990)	126	118	120	117	???	???
	Width Posterior	127	134	87	82	93.2	104
	Height Posterior	110	105	116	100	79	103
	Height Middle	67	68	72	79	63	69
	Width Middle	88	78	65	53	64	69
	Post Zygapophyses
	Articulation Surface Width	10.4	16.9	???	16.8	12.7	14
	Articulation Surface Length	17.4	???	???	22.2	26.5	29.4
	Pre Zygapophyses
	Articulation Surface Width	19.2	10.9	???	???	19.1	14.1
	Articulation Surface Length	29.8	29.2	42.2	???	36.4	40.9
	Ilium	Left Side
	Greatest Length	950
	Greatest Length (Bonaparte et al., 1990)	970
	Posteriori Height	230
	Brevis Length	350
	Brevis Width	77
	Brevis Depth	103
