# Supplementary material for: Dinosaur Speed Demon: The Caudal Musculature of Carnotaurus sastrei and Implications for the Evolution of South American Abelisaurids
Source: PLoS One. 2011 Oct 17;6(10):e25763. doi: 10.1371/journal.pone.0025763 (PMC3197156; doi:10.1371/journal.pone.0025763)
Supplement: Table S2 — Comparison of mass estimations from the test of muscle mass variation resulting from uncertain posterior tail form. Results indicate total tail muscle mass is potentially affected by less than 7%. (XLSX) [file pone.0025763.s004.xlsx]

## Sheet: Sheet1
		M. spinalis	M. longissimus	M. ilio-ischiocaudalis	M.caudofemoralis
	Long Tail Model	8000 g	18000 g	75000 g	225000
	Total tail muscle mass: 326000 g	0.025	0.055	0.23	0.69
	% Deviation from Conservative Model	0.14	0.17	0.16	0.01
		M. spinalis	M. longissimus	M. ilio-ischiocaudalis	M.caudofemoralis
	Short Tail Model	6000	14000 g	58000 g	210000 g
	Total tail muscle mass: 288000 g	0.021	0.049	0.201	0.729
	% Deviation from Conservative Model	0.14	0.07	0.08	0.05
